# Supplementary material for: PI 3-Kinase and the Histone Methyl-Transferase KMT2D Collaborate to Induce Arp2/3-Dependent Migration of Mammary Epithelial Cells
Source: Preprints.org preprint supplement (doi:10.20944/preprints202402.0907.v1), 2024-02-16
Supplement: Supplementary file 1 [file Table S2 Statistics.xlsx]

## Sheet: Fig1 EdU
0% GF
EdU	MCF10A DMSO	PIK3CA DMSO	KMT2D DMSO	Double-mutant DMSO	MCF10A 1 µM	PI3KCA 1 µM	KMT2D 1 µM	Double-mutant 1 µM	MCF10A 5 µM	PI3KCA 5 µM	KMT2D 5 µM	Double-mutant 5 µM
MCF10A DMSO
PIK3CA DMSO	<0.0001
KMT2D DMSO	>0.9999	<0.0001
Double-mutant DMSO	<0.0001	0.9987	<0.0001
MCF10A 1 µM	>0.9999	<0.0001	>0.9999	<0.0001
PI3KCA 1 µM	>0.9999	<0.0001	>0.9999	<0.0001	>0.9999
KMT2D 1 µM	>0.9999	<0.0001	>0.9999	<0.0001	>0.9999	>0.9999
Double-mutant 1 µM	>0.9999	<0.0001	>0.9999	<0.0001	>0.9999	>0.9999	>0.9999
MCF10A 5 µM	>0.9999	<0.0001	>0.9999	<0.0001	>0.9999	>0.9999	>0.9999	>0.9999
PI3KCA 5 µM	>0.9999	<0.0001	>0.9999	<0.0001	>0.9999	>0.9999	>0.9999	>0.9999	>0.9999
KMT2D 5 µM	>0.9999	<0.0001	>0.9999	<0.0001	>0.9999	>0.9999	>0.9999	>0.9999	>0.9999	>0.9999
Double-mutant 5 µM	>0.9999	<0.0001	>0.9999	<0.0001	>0.9999	>0.9999	>0.9999	>0.9999	>0.9999	>0.9999	>0.9999
1% GF
EdU	MCF10A DMSO	PIK3CA DMSO	KMT2D DMSO	Double-mutant DMSO	MCF10A 1 µM	PI3KCA 1 µM	KMT2D 1 µM	Double-mutant 1 µM	MCF10A 5 µM	PI3KCA 5 µM	KMT2D 5 µM	Double-mutant 5 µM
MCF10A DMSO
PIK3CA DMSO	0.0573
KMT2D DMSO	>0.9999	0.1311
Double-mutant DMSO	<0.0001	0.7858	0.0002
MCF10A 1 µM	<0.0001	0.0997	<0.0001	0.9881
PI3KCA 1 µM	0.0014	0.9955	0.0045	0.9998	0.7019
KMT2D 1 µM	<0.0001	<0.0001	<0.0001	0.0066	0.2269	0.0003
Double-mutant 1 µM	<0.0001	0.0453	<0.0001	0.9429	>0.9999	0.5031	0.3886
MCF10A 5 µM	<0.0001	<0.0001	<0.0001	<0.0001	<0.0001	<0.0001	<0.0001	<0.0001
PI3KCA 5 µM	<0.0001	<0.0001	<0.0001	<0.0001	<0.0001	<0.0001	<0.0001	<0.0001	0.896
KMT2D 5 µM	<0.0001	<0.0001	<0.0001	<0.0001	<0.0001	<0.0001	<0.0001	<0.0001	0.8484	>0.9999
Double-mutant 5 µM	<0.0001	<0.0001	<0.0001	<0.0001	<0.0001	<0.0001	<0.0001	<0.0001	0.9985	>0.9999	0.9997
2-way ANOVA followed by Tukey's test

## Sheet: Fig2 Matrigel
Figure 2A
Major axis	MCF10A DMSO	PIK3CA DMSO	KMT2D DMSO	Double-mutant DMSO
MCF10A DMSO
PIK3CA DMSO	0.0006
KMT2D DMSO	0.1296	<0.0001
Double-mutant DMSO	0.0016	>0.9999	<0.0001
Roundness	MCF10A DMSO	PIK3CA DMSO	KMT2D DMSO	Double-mutant DMSO
MCF10A DMSO
PIK3CA DMSO	0.0114
KMT2D DMSO	>0.9999	<0.0001
Double-mutant DMSO	0.0094	>0.9999	<0.0001
Kruskal-Wallis followed by Dunn's test
Figure 2B
Major axis	MCF10A DMSO	PIK3CA DMSO	KMT2D DMSO	Double-mutant DMSO	MCF10A BYL	PI3KCA BYL	KMT2D BYL	Double-mutant BYL
MCF10A DMSO
PIK3CA DMSO	<0.0001
KMT2D DMSO	>0.9999	<0.0001
Double-mutant DMSO	0.7549	0.0028	0.64
MCF10A BYL	0.9969	<0.0001	0.998	0.3565
PI3KCA BYL	0.7989	0.0825	0.7277	>0.9999	0.4699
KMT2D BYL	0.9997	<0.0001	0.9999	0.5163	>0.9999	0.7277
Double-mutant BYL	0.9994	0.0019	0.9982	0.9947	0.9541	>0.9999	0.9835
Roundness	MCF10A DMSO	PIK3CA DMSO	KMT2D DMSO	Double-mutant DMSO	MCF10A BYL	PI3KCA BYL	KMT2D BYL	Double-mutant BYL
MCF10A DMSO
PIK3CA DMSO	0.0005
KMT2D DMSO	>0.9999	<0.0001
Double-mutant DMSO	0.6938	0.1524	0.5354
MCF10A BYL	0.0096	0.9991	0.0031	0.5281
PI3KCA BYL	>0.9999	0.0068	>0.9999	0.7533	0.0423
KMT2D BYL	0.7519	0.2152	0.6167	>0.9999	0.6029	0.7852
Double-mutant BYL	0.6435	0.6048	0.5205	>0.9999	0.9047	0.678	>0.9999
2-way ANOVA followed by Tukey's test

## Sheet: Fig3 Collect migr BYL
Edge speed. compared at 720 min	MCF10A DMSO	PIK3CA DMSO	KMT2D DMSO	Double-mutant DMSO	MCF10A BYL	PI3KCA BYL	KMT2D BYL	Double-mutant BYL
MCF10A DMSO
PIK3CA DMSO	<0.0001
KMT2D DMSO	0.5622	0.0013
Double-mutant DMSO	0.0006	0.6884	0.1716
MCF10A BYL	0.2344	<0.0001	0.0018	<0.0001
PI3KCA BYL	0.0161	<0.0001	<0.0001	<0.0001	0.9728
KMT2D BYL	0.0033	<0.0001	<0.0001	<0.0001	0.8236	0.9998
Double-mutant BYL	0.0209	<0.0001	<0.0001	<0.0001	0.9833	>0.9999	0.9993
two-way ANOVA followed by Tukey's test
Velocity plotted at 8 h. compared at 420 μm distance from the edge	MCF10A DMSO	PIK3CA DMSO	KMT2D DMSO	Double-mutant DMSO	MCF10A BYL	PI3KCA BYL	KMT2D BYL	Double-mutant BYL
MCF10A DMSO
PIK3CA DMSO	0.1591
KMT2D DMSO	>0.9999	0.1741
Double-mutant DMSO	0.1075	>0.9999	0.1184
MCF10A BYL	0.4021	0.0028	0.3766	0.0018
PI3KCA BYL	0.6728	0.0075	0.644	0.0049	0.9998
KMT2D BYL	0.5256	0.0086	0.5003	0.0059	>0.9999	0.9998
Double-mutant BYL	0.59	0.0056	0.5607	0.0036	>0.9999	>0.9999	>0.9999
two-way ANOVA followed by Tukey's test
Order plotted at 8h. compared at 420 μm distance from the edge	MCF10A DMSO	PIK3CA DMSO	KMT2D DMSO	Double-mutant DMSO	MCF10A BYL	PI3KCA BYL	KMT2D BYL	Double-mutant BYL
MCF10A DMSO
PIK3CA DMSO	0.9972
KMT2D DMSO	>0.9999	0.9985
Double-mutant DMSO	0.9981	>0.9999	0.999
MCF10A BYL	0.0036	0.001	0.0031	0.001
PI3KCA BYL	0.046	0.0129	0.0409	0.014	0.9407
KMT2D BYL	0.0188	0.0059	0.0169	0.0064	>0.9999	0.9912
Double-mutant BYL	0.0068	0.0018	0.006	0.002	>0.9999	0.9872	>0.9999
two-way ANOVA followed by Tukey's test

## Sheet: Fig4 qRT-PCR
CCND1	MCF10A DMSO	PIK3CA DMSO	KMT2D DMSO	Double-mutant DMSO	MCF10A BYL	PI3KCA BYL	KMT2D BYL	Double-mutant BYL
MCF10A DMSO
PIK3CA DMSO	0.99
KMT2D DMSO	>0.9999	0.9995
Double-mutant DMSO	0.101	0.3655	0.1716
MCF10A BYL	0.9926	>0.9999	0.9997	0.3458
PI3KCA BYL	0.4982	0.9166	0.6803	0.9574	0.9031
KMT2D BYL	>0.9999	0.9993	>0.9999	0.1642	0.9996	0.6647
Double-mutant BYL	0.0346	0.1501	0.0618	0.9987	0.1401	0.7241	0.0588
CDKN1B	MCF10A DMSO	PIK3CA DMSO	KMT2D DMSO	Double-mutant DMSO	MCF10A BYL	PI3KCA BYL	KMT2D BYL	Double-mutant BYL
MCF10A DMSO
PIK3CA DMSO	0.6069
KMT2D DMSO	0.9741	0.9842
Double-mutant DMSO	0.0883	0.88	0.4038
MCF10A BYL	0.0591	0.0017	0.0094	0.0001
PI3KCA BYL	0.9653	0.1494	0.5259	0.0129	0.323
KMT2D BYL	0.1181	0.0036	0.0198	0.0003	>0.9999	0.5259
Double-mutant BYL	>0.9999	0.8201	0.9987	0.1714	0.0286	0.8455	0.0591
PLAUR	MCF10A DMSO	PIK3CA DMSO	KMT2D DMSO	Double-mutant DMSO	MCF10A BYL	PI3KCA BYL	KMT2D BYL	Double-mutant BYL
MCF10A DMSO
PIK3CA DMSO	0.2041
KMT2D DMSO	0.6442	0.0077
Double-mutant DMSO	0.0025	0.3222	<0.0001
MCF10A BYL	0.4888	0.0046	>0.9999	<0.0001
PI3KCA BYL	0.8651	0.0174	0.9998	0.0002	0.9963
KMT2D BYL	0.7299	0.0102	>0.9999	0.0001	0.9999	>0.9999
Double-mutant BYL	0.9208	0.8155	0.1213	0.0252	0.0758	0.2424	0.1562
ITGA2	MCF10A DMSO	PIK3CA DMSO	KMT2D DMSO	Double-mutant DMSO	MCF10A BYL	PI3KCA BYL	KMT2D BYL	Double-mutant BYL
MCF10A DMSO
PIK3CA DMSO	0.5051
KMT2D DMSO	0.9855	0.1439
Double-mutant DMSO	0.2423	0.9991	0.0545
MCF10A BYL	0.1807	0.9947	0.0385	>0.9999
PI3KCA BYL	0.0076	0.2923	0.0014	0.5785	0.6875
KMT2D BYL	0.9805	0.948	0.6436	0.7213	0.6136	0.0444
Double-mutant BYL	0.0003	0.0137	<0.0001	0.039	0.0552	0.6823	0.0016
ARPC5L	MCF10A DMSO	PIK3CA DMSO	KMT2D DMSO	Double-mutant DMSO	MCF10A BYL	PI3KCA BYL	KMT2D BYL	Double-mutant BYL
MCF10A DMSO
PIK3CA DMSO	0.0054
KMT2D DMSO	0.9952	0.0218
Double-mutant DMSO	0.0042	>0.9999	0.017
MCF10A BYL	0.9767	0.0336	>0.9999	0.0262
PI3KCA BYL	0.9983	0.0175	>0.9999	0.0136	>0.9999
KMT2D BYL	>0.9999	0.0095	0.9998	0.0074	0.9972	>0.9999
Double-mutant BYL	0.4392	0.2675	0.8395	0.2196	0.9247	0.7841	0.6058
CYFIP2	MCF10A DMSO	PIK3CA DMSO	KMT2D DMSO	Double-mutant DMSO	MCF10A BYL	PI3KCA BYL	KMT2D BYL	Double-mutant BYL
MCF10A DMSO
PIK3CA DMSO	0.7082
KMT2D DMSO	0.3929	0.9991
Double-mutant DMSO	0.1611	0.9371	0.9985
MCF10A BYL	0.344	0.0187	0.0064	0.002
PI3KCA BYL	0.7399	0.0711	0.0252	0.008	0.9956
KMT2D BYL	0.9762	0.995	0.8975	0.5922	0.073	0.2421
Double-mutant BYL	0.9999	0.9025	0.6257	0.3052	0.1852	0.5011	0.9992
VIM	MCF10A DMSO	PIK3CA DMSO	KMT2D DMSO	Double-mutant DMSO	MCF10A BYL	PI3KCA BYL	KMT2D BYL	Double-mutant BYL
MCF10A DMSO
PIK3CA DMSO	0.8329
KMT2D DMSO	0.9032	>0.9999
Double-mutant DMSO	0.7175	>0.9999	0.9999
MCF10A BYL	0.9938	0.9965	0.9994	0.9816
PI3KCA BYL	0.0284	0.3342	0.2597	0.4475	0.1131
KMT2D BYL	0.0052	0.0802	0.0584	0.119	0.0223	0.9847
Double-mutant BYL	0.1034	0.7228	0.622	0.8372	0.3416	0.9959	0.7618
CDH2	MCF10A DMSO	PIK3CA DMSO	KMT2D DMSO	Double-mutant DMSO	MCF10A BYL	PI3KCA BYL	KMT2D BYL	Double-mutant BYL
MCF10A DMSO
PIK3CA DMSO	0.9868
KMT2D DMSO	0.9998	0.8948
Double-mutant DMSO	0.4901	0.9245	0.2772
MCF10A BYL	>0.9999	0.9188	>0.9999	0.3075
PI3KCA BYL	0.3814	0.8502	0.2032	>0.9999	0.2274
KMT2D BYL	>0.9999	0.9804	>0.9999	0.4547	>0.9999	0.3503
Double-mutant BYL	0.1328	0.47	0.0618	0.9834	0.0705	0.9963	0.1191
ITGA5	MCF10A DMSO	PIK3CA DMSO	KMT2D DMSO	Double-mutant DMSO	MCF10A BYL	PI3KCA BYL	KMT2D BYL	Double-mutant BYL
MCF10A DMSO
PIK3CA DMSO	0.7875
KMT2D DMSO	0.3059	0.0211
Double-mutant DMSO	0.979	0.9985	0.0651
MCF10A BYL	0.1908	0.9251	0.0021	0.6408
PI3KCA BYL	0.7244	>0.9999	0.0168	0.9953	0.9549
KMT2D BYL	0.9776	0.9986	0.0638	>0.9999	0.6473	0.9957
Double-mutant BYL	0.3944	0.996	0.0055	0.8908	0.9995	0.9987	0.8948
MMP14	MCF10A DMSO	PIK3CA DMSO	KMT2D DMSO	Double-mutant DMSO	MCF10A BYL	PI3KCA BYL	KMT2D BYL	Double-mutant BYL
MCF10A DMSO
PIK3CA DMSO	>0.9999
KMT2D DMSO	>0.9999	>0.9999
Double-mutant DMSO	0.9949	0.9991	0.9996
MCF10A BYL	0.072	0.0516	0.0461	0.0183
PI3KCA BYL	0.2034	0.1514	0.1366	0.0576	0.9983
KMT2D BYL	0.0438	0.0311	0.0277	0.0109	>0.9999	0.985
Double-mutant BYL	0.6279	0.5216	0.4867	0.2528	0.8149	0.9856	0.6693
RAC2	MCF10A DMSO	PIK3CA DMSO	KMT2D DMSO	Double-mutant DMSO	MCF10A BYL	PI3KCA BYL	KMT2D BYL	Double-mutant BYL
MCF10A DMSO
PIK3CA DMSO	0.9983
KMT2D DMSO	0.887	0.996
Double-mutant DMSO	>0.9999	0.9983	0.888
MCF10A BYL	0.0921	0.0299	0.0078	0.0917
PI3KCA BYL	0.1875	0.0653	0.0175	0.1867	0.9999
KMT2D BYL	0.0453	0.0142	0.0037	0.0451	>0.9999	0.9906
Double-mutant BYL	0.2985	0.1124	0.0312	0.2974	0.9951	>0.9999	0.9472
RAC3	MCF10A DMSO	PIK3CA DMSO	KMT2D DMSO	Double-mutant DMSO	MCF10A BYL	PI3KCA BYL	KMT2D BYL	Double-mutant BYL
MCF10A DMSO
PIK3CA DMSO	0.9956
KMT2D DMSO	0.9985	>0.9999
Double-mutant DMSO	0.5186	0.8932	0.8482
MCF10A BYL	0.5238	0.8965	0.8521	>0.9999
PI3KCA BYL	0.2224	0.5683	0.5033	0.998	0.9978
KMT2D BYL	0.224	0.5711	0.5059	0.9981	0.9979	>0.9999
Double-mutant BYL	0.0661	0.2227	0.1864	0.8762	0.8726	0.9956	0.9954
2-way ANOVA followed by Tukey's test

## Sheet: Fig5 Collect migr siARPC5L
Edge speed. compared at 720 min	MCF10A siCtrl	PIK3CA siCtrl	KMT2D siCtrl	Double-mutant siCtrl	MCF10A siARPC5L	PIK3CA siARPC5L	KMT2D siARPC5L	Double-mutant siARPC5L
MCF10A siCtrl
PIK3CA siCtrl	0.6777
KMT2D siCtrl	0.8995	0.9994
Double-mutant siCtrl	0.8857	0.9997	>0.9999
MCF10A siARPC5L	>0.9999	0.848	0.9796	0.9744
PIK3CA siARPC5L	0.6273	>0.9999	0.9982	0.9988	0.8059
KMT2D siARPC5L	0.9728	0.9891	>0.9999	>0.9999	0.9981	0.9797
Double-mutant siARPC5L	0.9064	0.9992	>0.9999	>0.9999	0.982	0.9977	>0.9999
two-way ANOVA followed by Tukey's test
Order plotted at 8h. compared at 420 μm distance from the edge	MCF10A siCtrl	PIK3CA siCtrl	KMT2D siCtrl	Double-mutant siCtrl	MCF10A siARPC5L	PIK3CA siARPC5L	KMT2D siARPC5L	Double-mutant siARPC5L
MCF10A siCtrl
PIK3CA siCtrl	0.9994
KMT2D siCtrl	>0.9999	>0.9999
Double-mutant siCtrl	0.9996	>0.9999	>0.9999
MCF10A siARPC5L	>0.9999	0.9888	0.9992	0.9913
PIK3CA siARPC5L	0.9993	>0.9999	>0.9999	>0.9999	0.9881
KMT2D siARPC5L	0.9946	0.9162	0.9776	0.9266	0.9999	0.9136
Double-mutant siARPC5L	>0.9999	0.9974	>0.9999	0.9982	>0.9999	0.9971	0.9985
two-way ANOVA followed by Tukey's test

## Sheet: Fig6+S4 Single cell migration
Speed	MCF10A siCtrl	PIK3CA siCtrl	KMT2D siCtrl	Double-mutant siCtrl	MCF10A siARPC5	PIK3CA siARPC5	KMT2D siARPC5	Double-mutant siARPC5	MCF10A siARPC5L	PIK3CA siARPC5L	KMT2D siARPC5L	Double-mutant siARPC5L
MCF10A siCtrl
PIK3CA siCtrl	<0.0001
KMT2D siCtrl	<0.0001	>0.9999
Double-mutant siCtrl	<0.0001	>0.9999	>0.9999
MCF10A siARPC5	0.9984	<0.0001	<0.0001	<0.0001
PIK3CA siARPC5	<0.0001	>0.9999	0.9954	0.9996	<0.0001
KMT2D siARPC5	0.0024	0.9133	0.9977	0.9902	<0.0001	0.6758
Double-mutant siARPC5	<0.0001	>0.9999	>0.9999	>0.9999	<0.0001	>0.9999	0.9719
MCF10A siARPC5L	0.9814	<0.0001	<0.0001	<0.0001	>0.9999	<0.0001	<0.0001	<0.0001
PIK3CA siARPC5L	<0.0001	>0.9999	>0.9999	>0.9999	<0.0001	>0.9999	0.8703	>0.9999	<0.0001
KMT2D siARPC5L	0.0017	0.9364	0.9989	0.9944	<0.0001	0.7249	>0.9999	0.9819	<0.0001	0.9025
Double-mutant siARPC5L	0.0002	0.9979	>0.9999	>0.9999	<0.0001	0.9585	>0.9999	0.9999	<0.0001	0.9964	>0.9999
two-way ANOVA followed by Tukey's test
Persistence	MCF10A siCtrl	PIK3CA siCtrl	KMT2D siCtrl	Double-mutant siCtrl	MCF10A siARPC5	PIK3CA siARPC5	KMT2D siARPC5	Double-mutant siARPC5	MCF10A siARPC5L	PIK3CA siARPC5L	KMT2D siARPC5L	Double-mutant siARPC5L
MCF10A siCtrl
PIK3CA siCtrl	0.008
KMT2D siCtrl	0.34	5.7e-05
Double-mutant siCtrl	6.9e-07	0.004	6.6e-11
MCF10A siARPC5	0.085	0.43	0.0034	0.00084
PIK3CA siARPC5	0.00021	0.29	1.1e-07	0.044	0.07
KMT2D siARPC5	0.024	0.67	0.00032	0.0011	0.7	0.13
Double-mutant siARPC5	7.9e-06	0.028	1.6e-09	0.47	0.0057	0.2	0.009
MCF10A siARPC5L	0.16	0.16	0.0082	4.6e-05	0.64	0.012	0.35	0.00053
PIK3CA siARPC5L	0.0019	0.6	5.9e-06	0.017	0.21	0.6	0.34	0.091	0.058
KMT2D siARPC5L	0.11	0.34	0.0046	0.00043	0.89	0.045	0.58	0.0032	0.75	0.15
Double-mutant siARPC5L	0.0042	0.73	2.1e-05	0.015	0.28	0.5	0.44	0.075	0.096	0.88	0.21
one-way ANOVA on non-linear mixed-effect models
